# Supplementary material for: Multiple Nf1 Schwann cell populations reprogram the plexiform neurofibroma tumor microenvironment
Source: PubMed Central journal article supplement (PMC9675562; doi:10.1172/jci.insight.154513), 2022-09-22

## SUPPLEMENTAL MATERIAL

**Spreadsheet S1.** scRNA-seq quality metrics of mouse PN (7 mo. *Dhh-Cre;Nf1<sup>fl/fl</sup>*), pretumor (2 mo. *Dhh-Cre;Nf1<sup>fl/fl</sup>*), and corresponding 7 mo. and 2 mo. *Nf1<sup>fl/fl</sup>* littermate controls as determined by Cell Ranger.

**Spreadsheet S2.** The top 50 markers for each cluster from the integrated mouse data object as determined by Seurat's FindAllMarkers function.

**Spreadsheet S3.** Seurat numerical cluster annotation, cell type annotation, cluster merging designations, and calculated doublet percentages.

**Spreadsheet S4.** Differentially expressed genes of plexiform versus seven month age-matched control and pretumor versus two month age-matched control. First two tabs show changes with a fold-change (FC) cutoff of >2. Last two tabs show all raw data.

**Spreadsheet S5.** CellPhoneDB predicted receptor-ligand interactions, shared between human and mouse PN and absent in mouse controls, for all clusters. Tab 1, Annotation key. Tab 2, Cluster interactions for each receptor ligand pair.

**Fig. S1.** Heatmap of top five markers for each cluster (Seurat). Shared markers shown once. For ease of visualization, each cluster was subsampled to 100 cells during heatmap generation.

**Fig. S2.** UMAP representation of doublet scores as determined by Scrublet, arrow shows cluster 25 which contained 55% doublets and was ignored for determining cell type proportions.

**Fig. S3.** DotPlot shows average expression of all transcripts encoding collagens in each cluster, highlighting the expression largely in fibroblast and SC clusters.

**Fig. S4.** Complete network plots for each SC cluster in PN, showing transcription factors up- or down-regulated versus controls (fold > 1.2), and genes predicted to be regulated by the transcription factors. Network plots for all clusters available as individual PDFs on Github.

**Fig. S5.** Integrated human PN UMAP showing original annotations, prior to mouse label transfer.

0 1 2 3 4 5 6 7 8 9 10 11 12 13 14 15 16 17 18 19 20 21 22 23 24 25 26 27 28 29 30

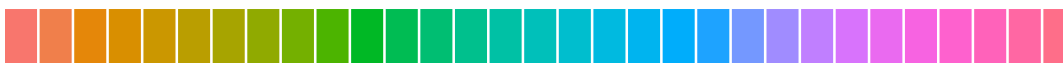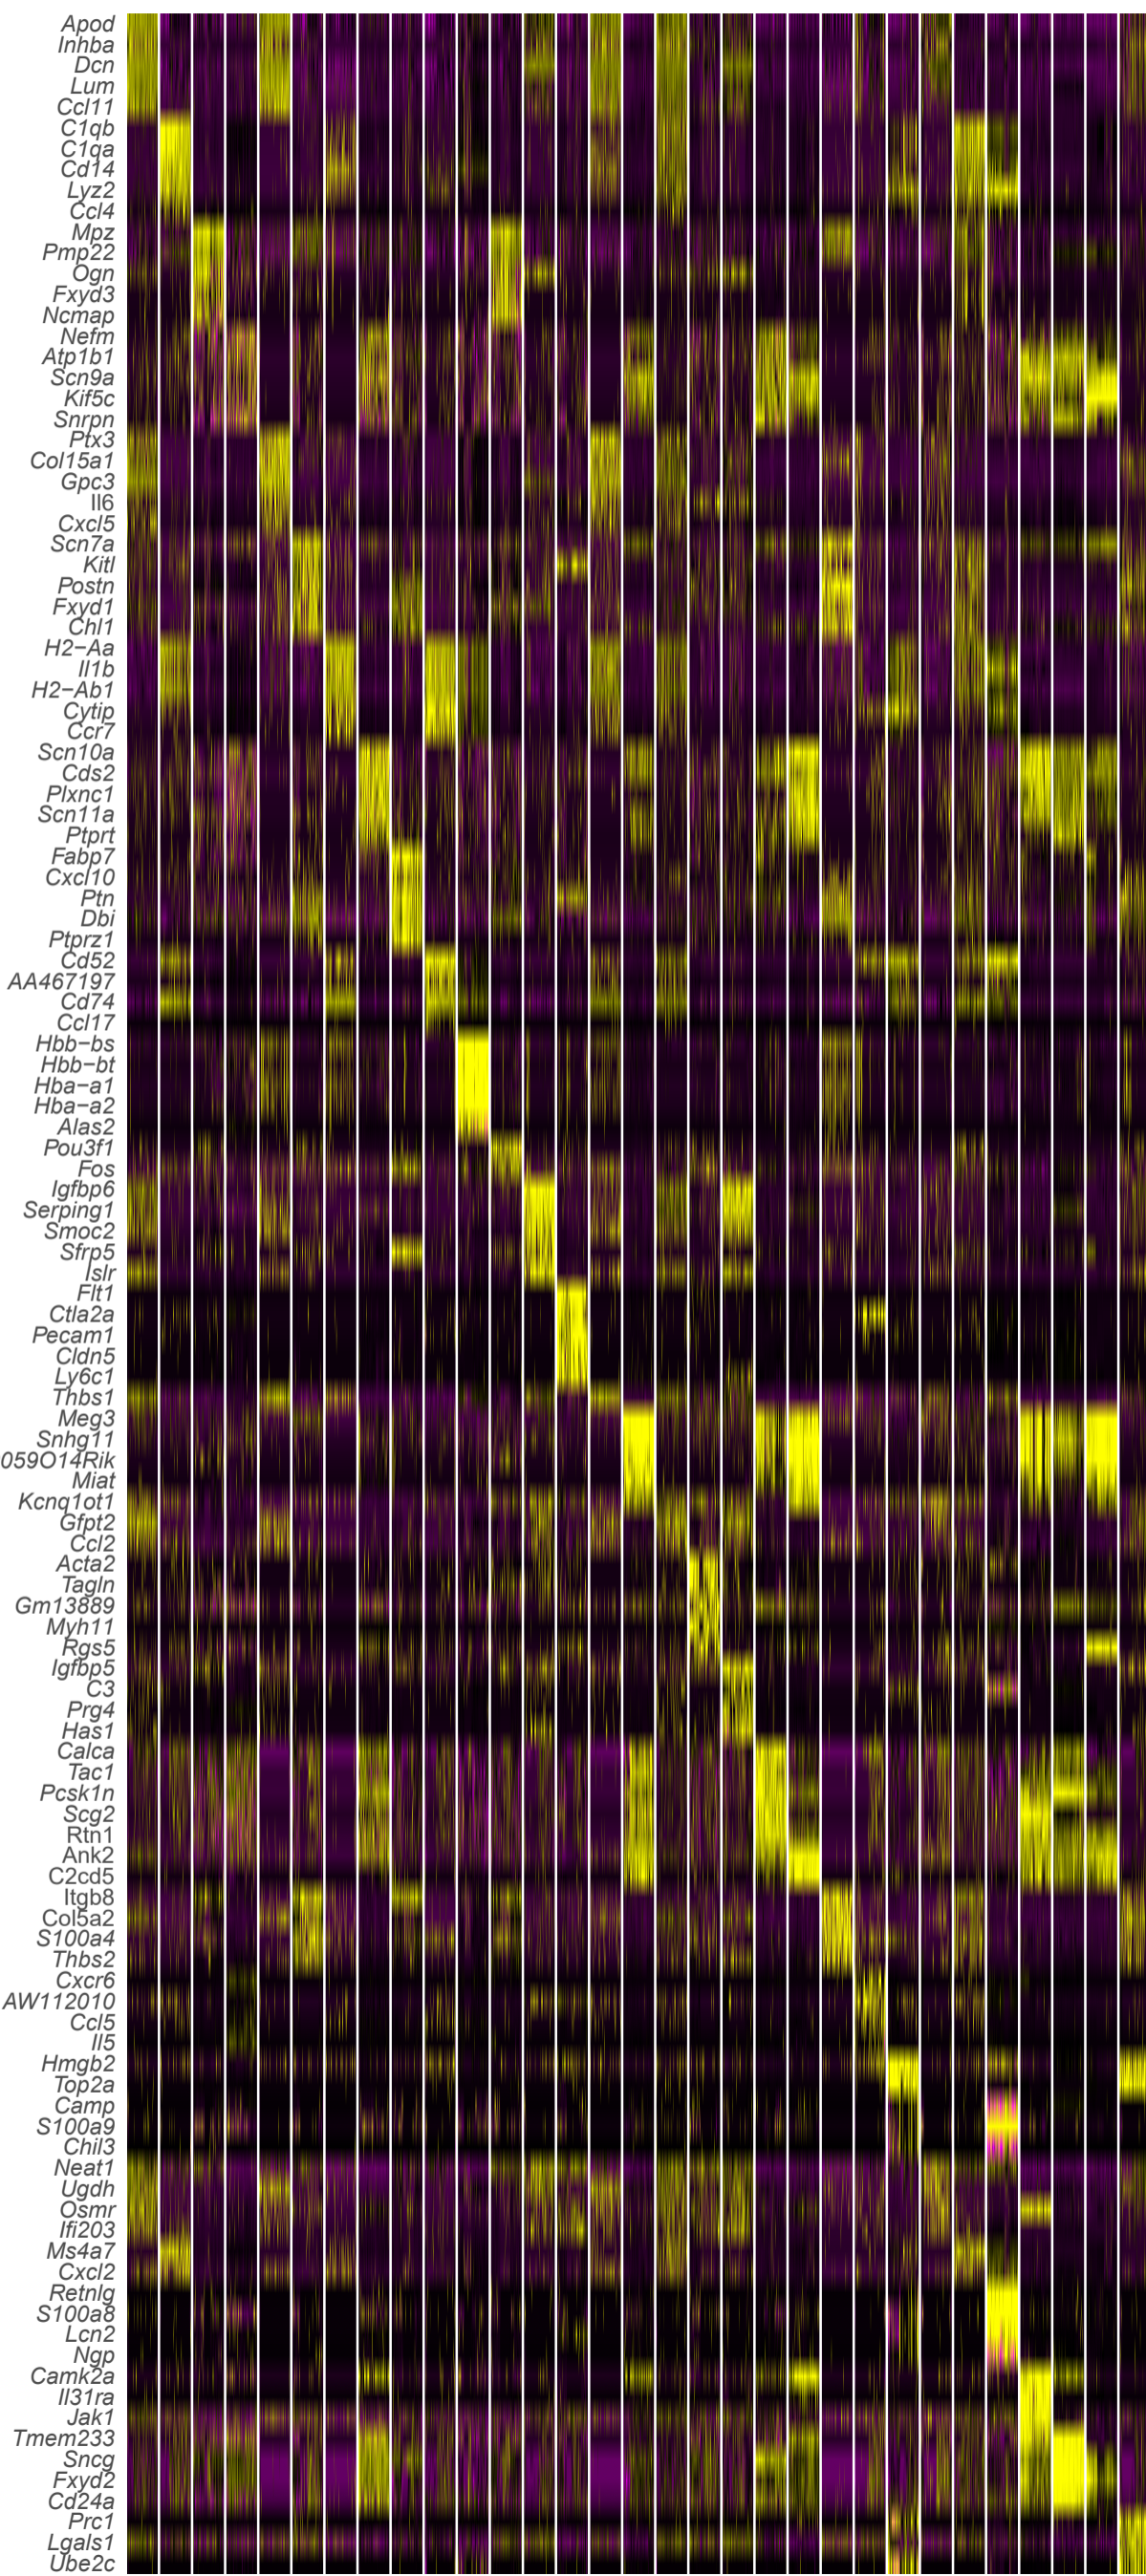

Identity

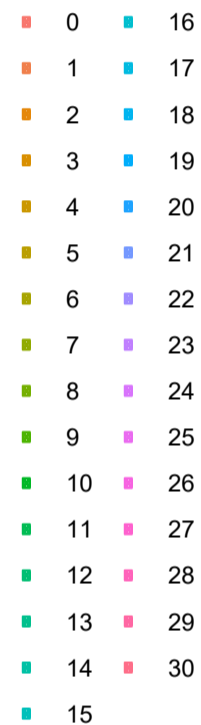

Expression

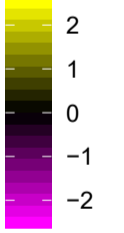

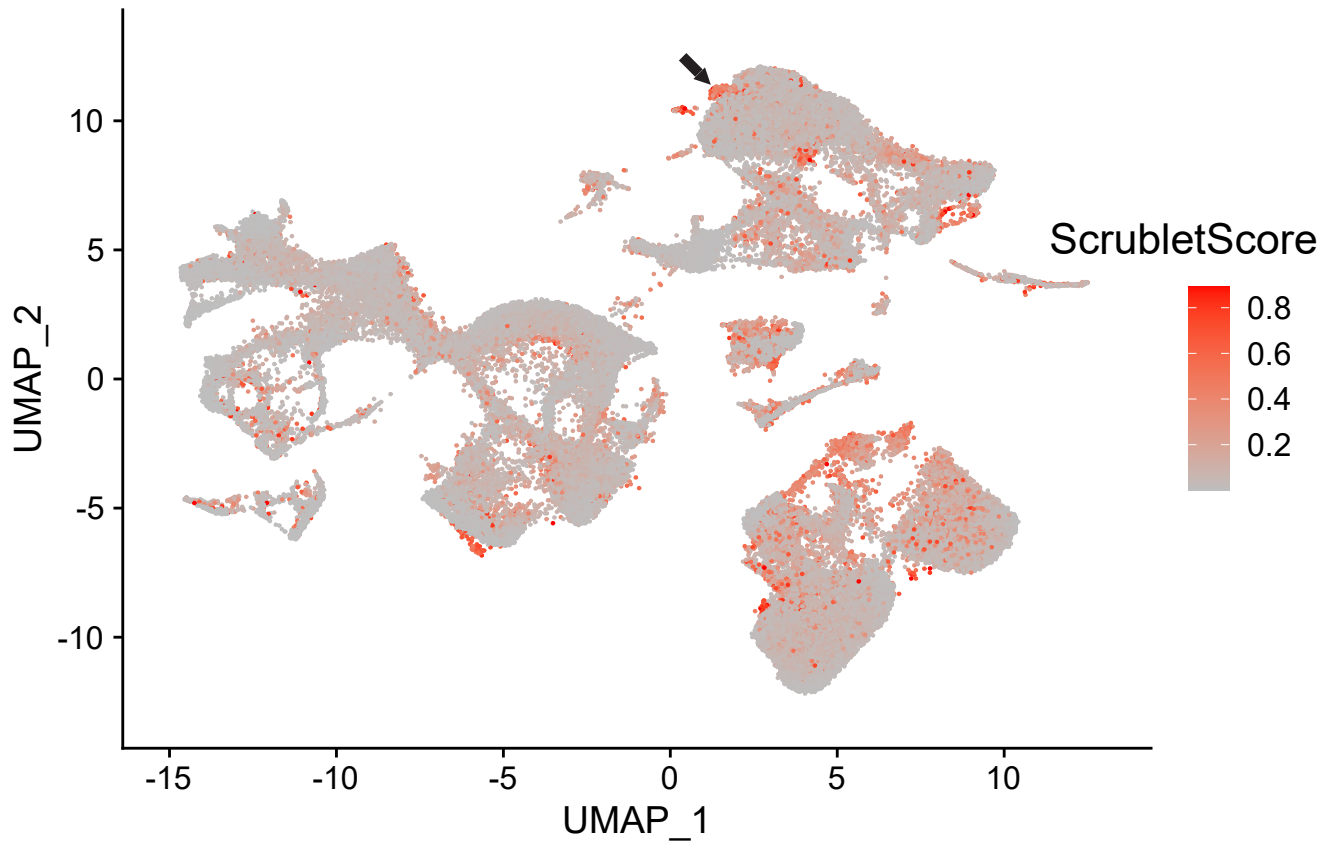

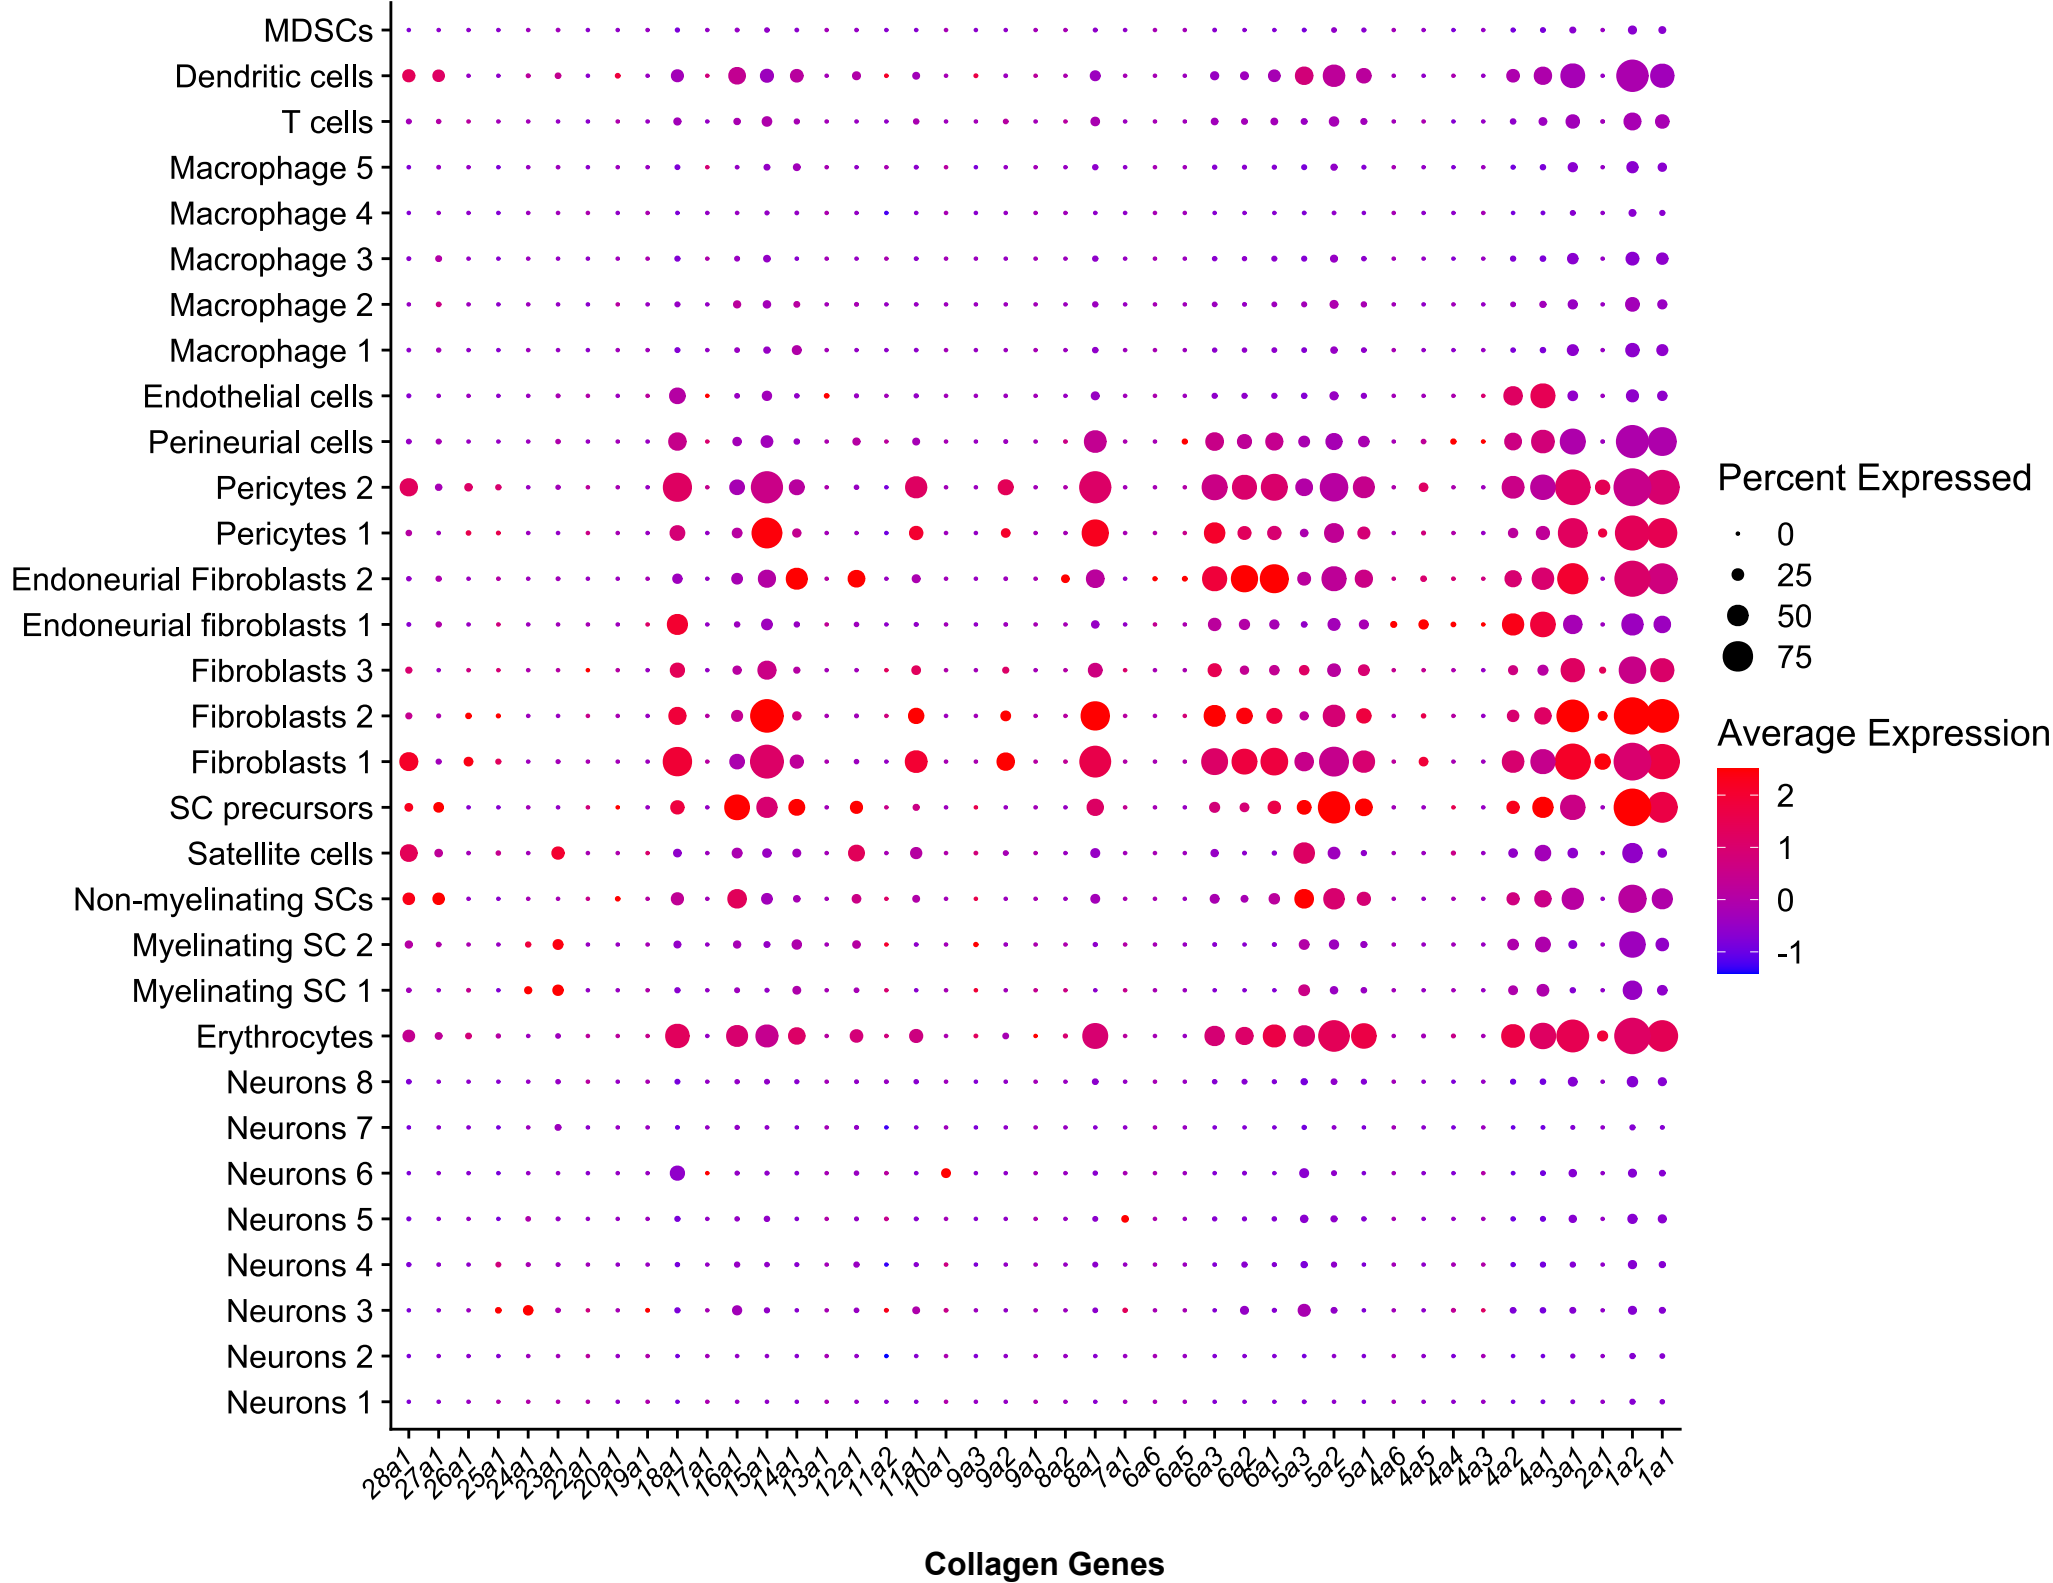



# NMSC

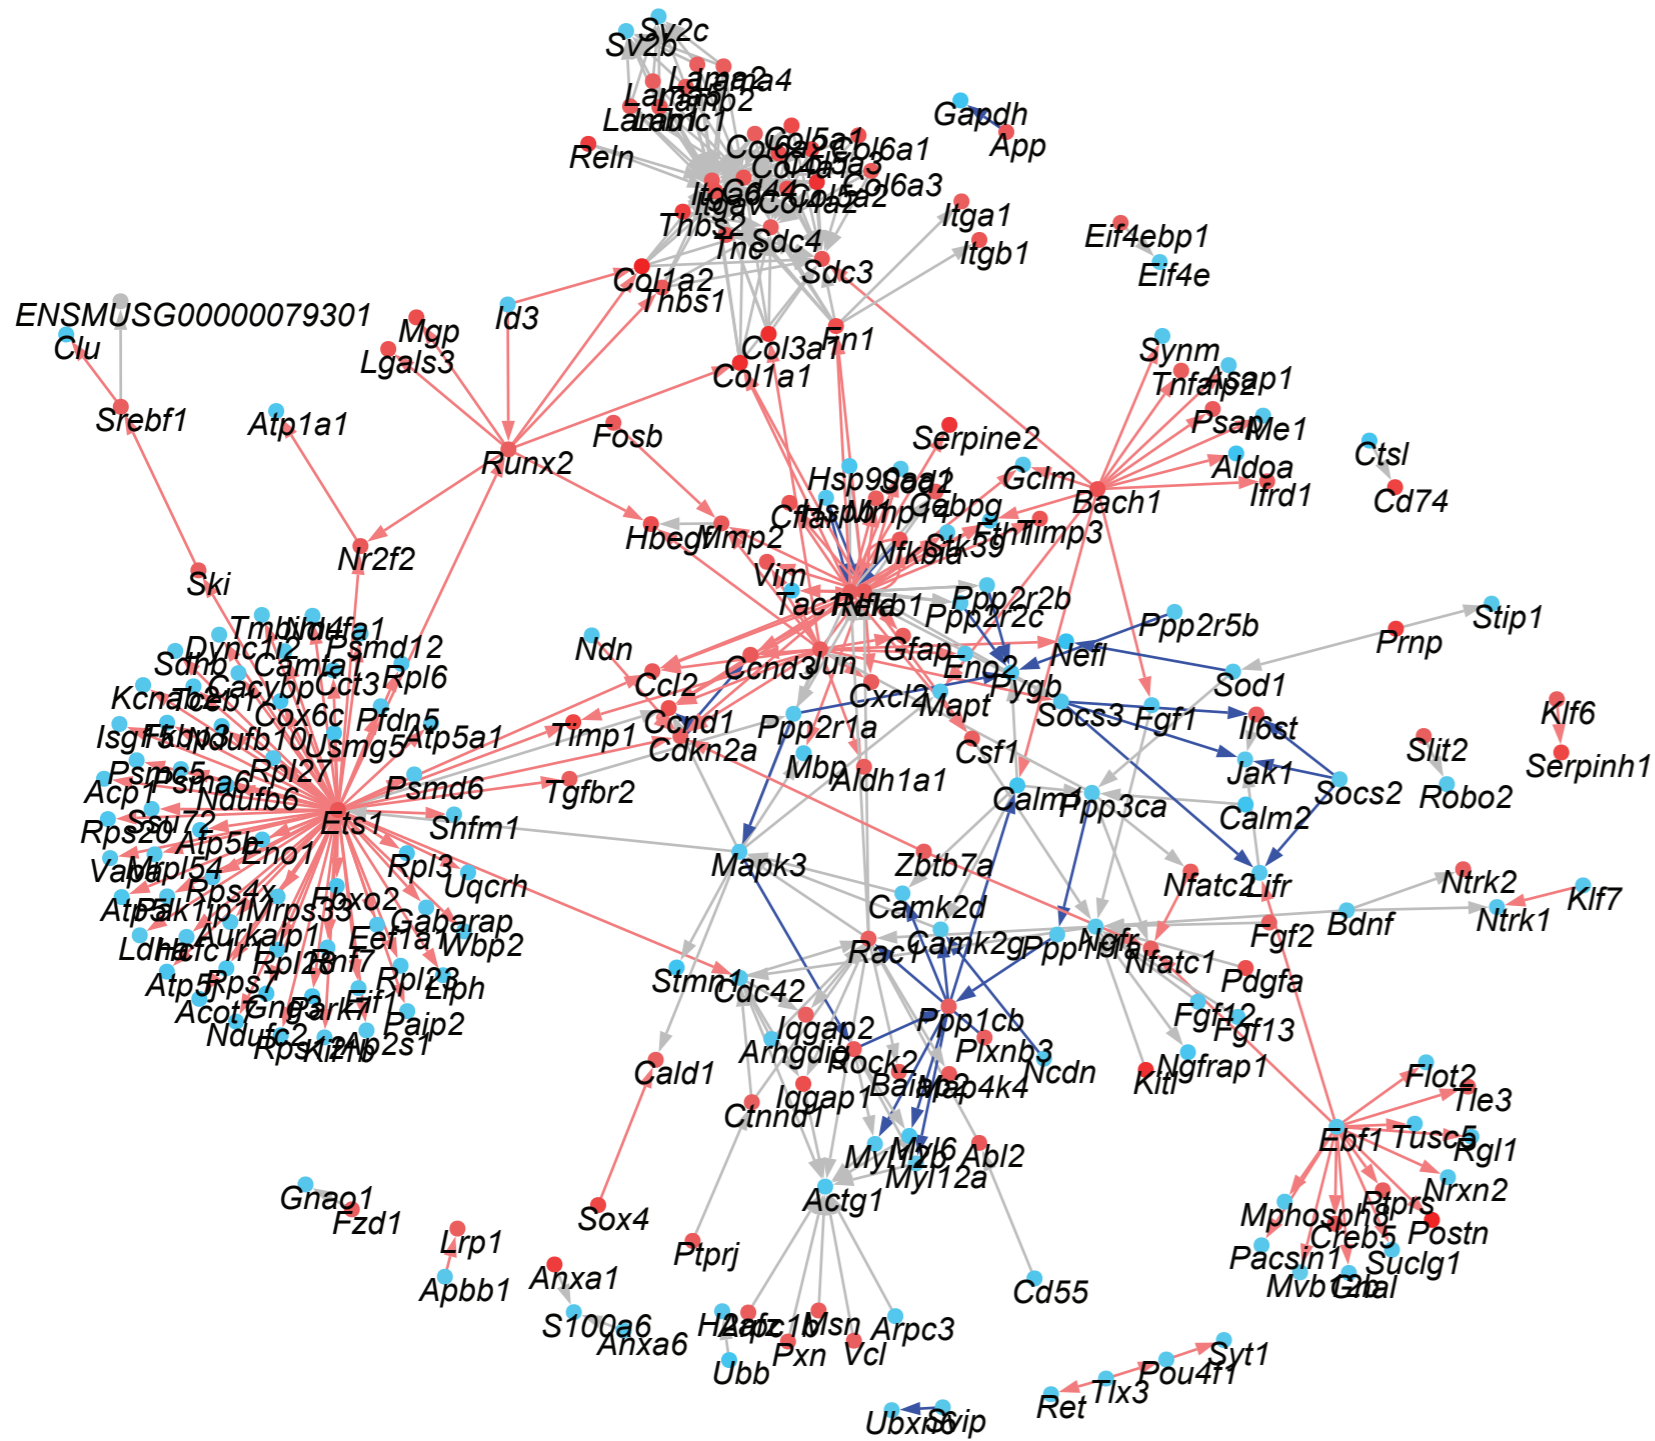

# MSC 1

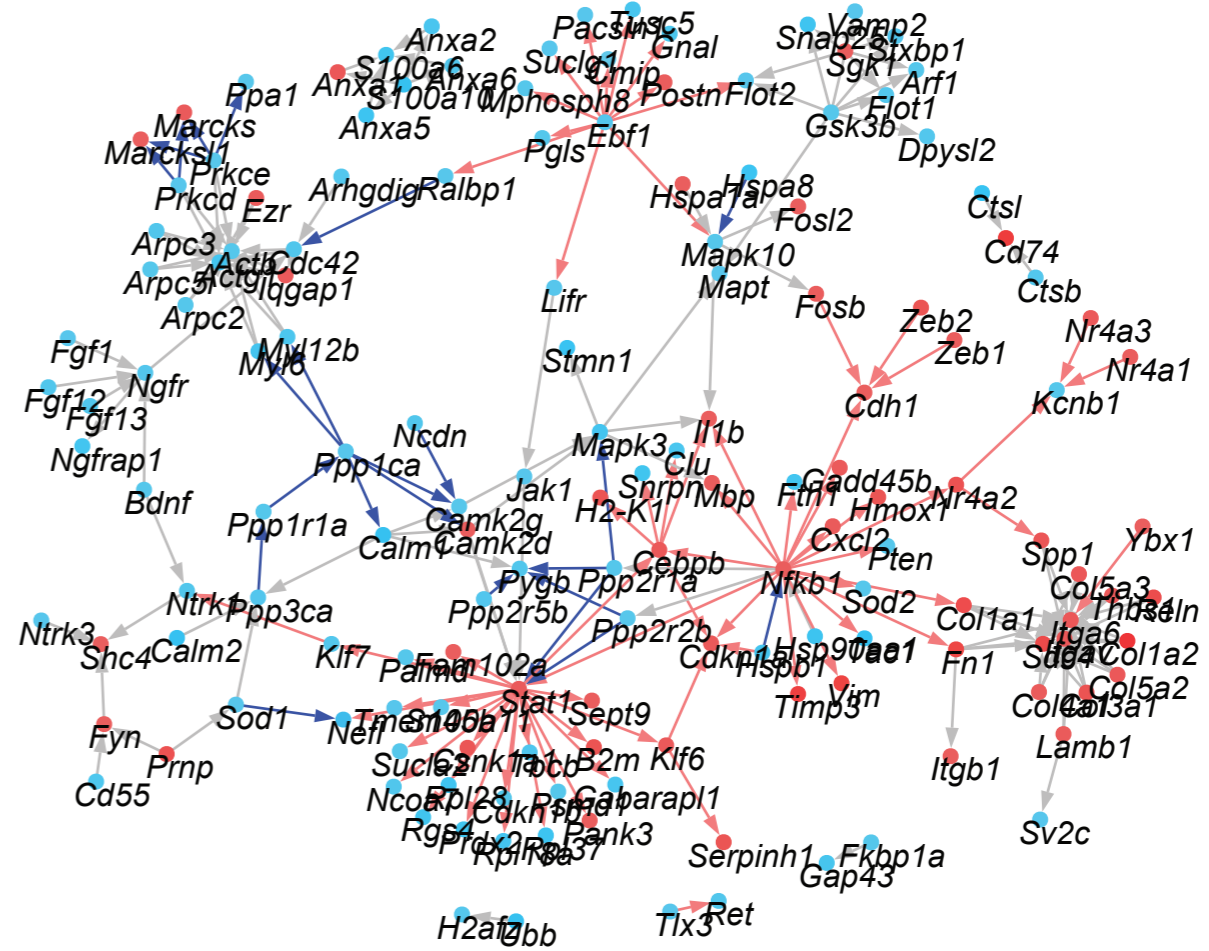

# MSC 2

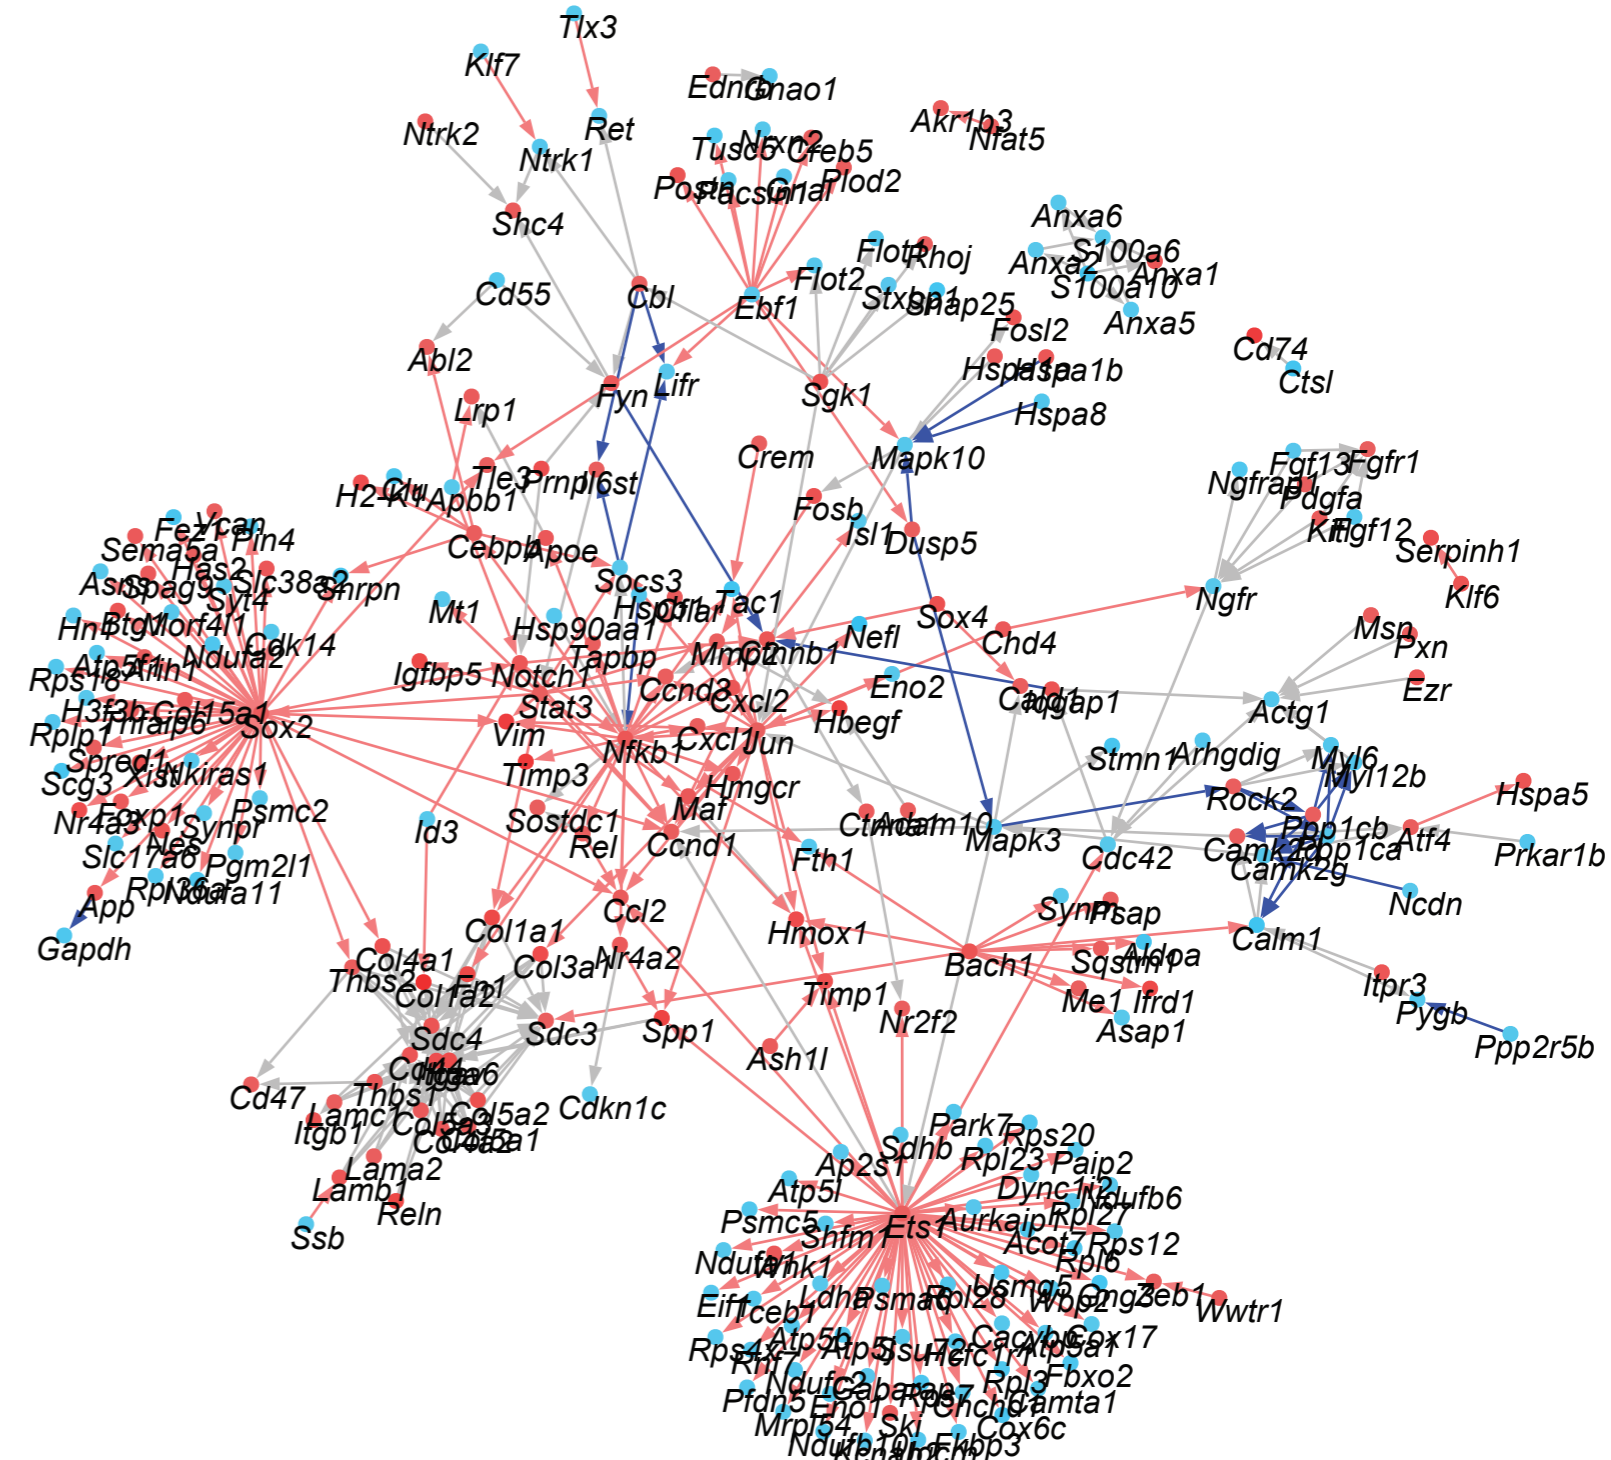

# SGC

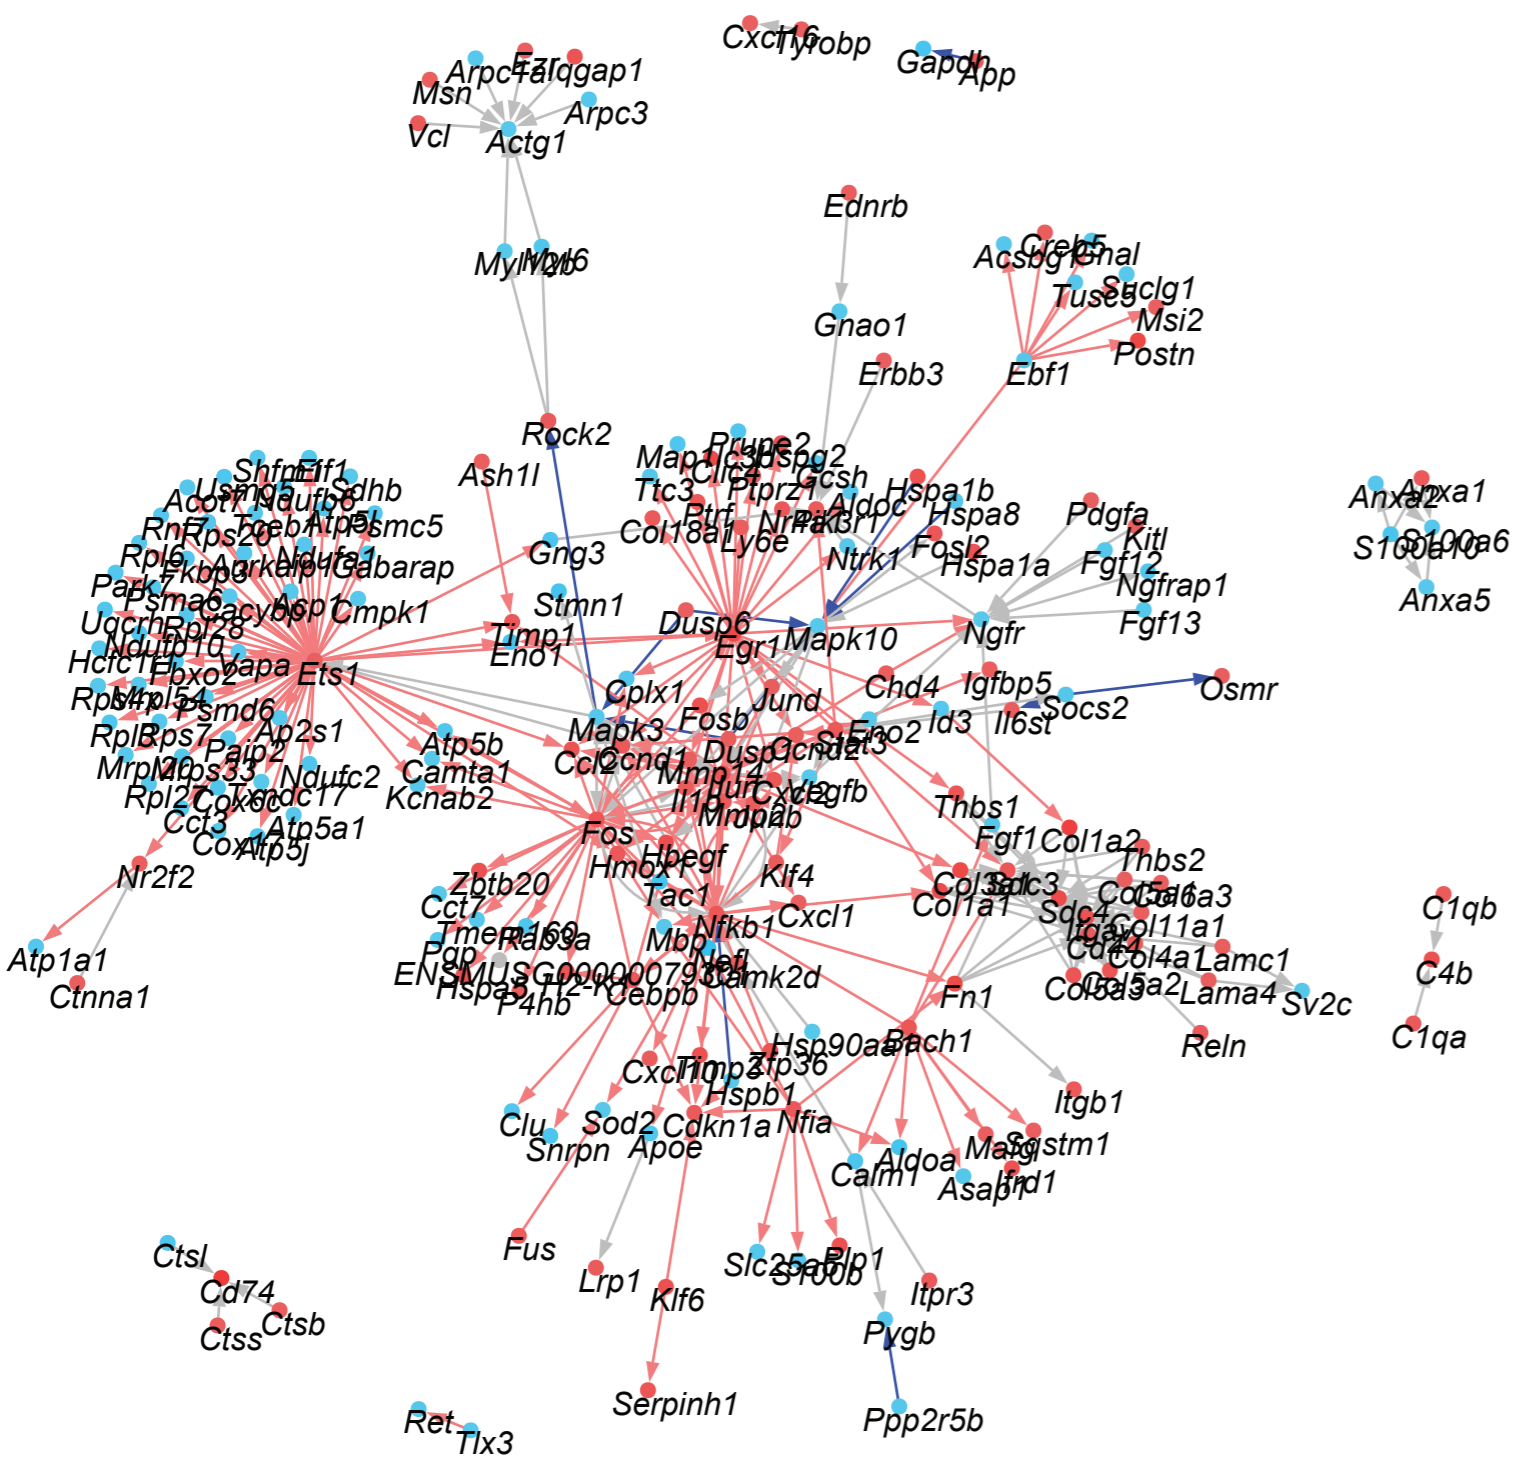



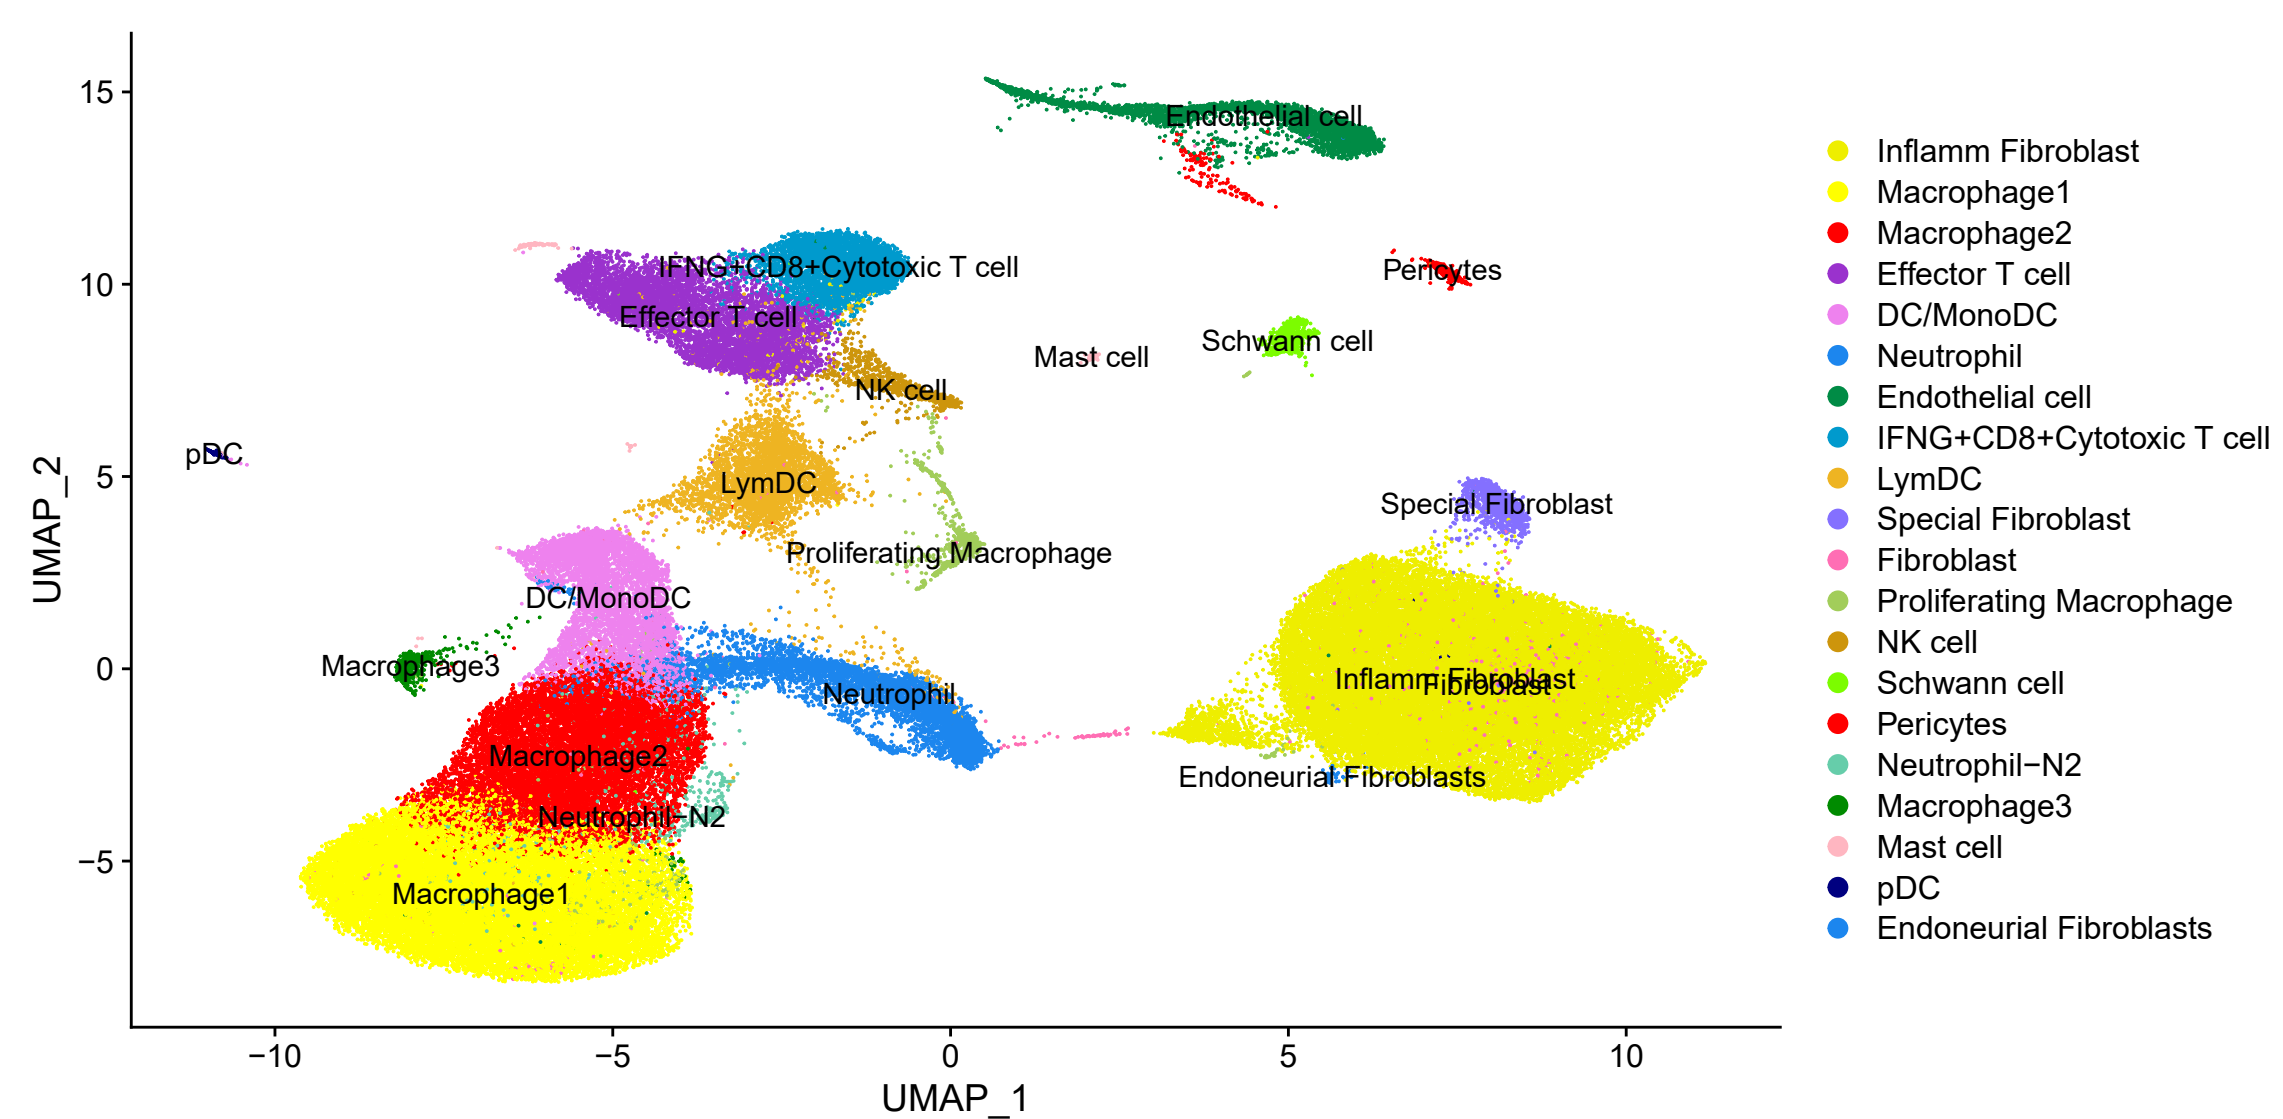

Supplement: jciinsight-7-154513-s209.pdf [file jciinsight-7-154513-s209.pdf]
